# Supplementary material for: Age-related circadian disorganization caused by sympathetic dysfunction in peripheral clock regulation
Source: PubMed Central journal article supplement (PMC5515066; doi:10.1038/npjamd.2016.30), 2017-01-05
Supplement: npjamd201630-s1.pdf [file npjamd201630-s1.pdf]

## Supplementary Information

### **Age-related circadian disorganization caused by sympathetic dysfunction in peripheral clock regulation**

Yu Tahara<sup>1, 2</sup>, Yuta Takatsu<sup>1</sup>, Takuya Shiraishi<sup>1</sup>, Yosuke Kikuchi<sup>1</sup>, Mayu Yamazaki<sup>1</sup>, Hiroaki Motohashi<sup>1</sup>, Aya Muto<sup>1</sup>, Hiroyuki Sasaki<sup>1</sup>, Atsushi Haraguchi<sup>1</sup>, Daisuke Kuriki<sup>1</sup>, Takahiro J. Nakamura<sup>3</sup>, and Shigenobu Shibata\*<sup>1</sup>

<sup>1</sup>Laboratory of Physiology and Pharmacology, School of Advanced Science and Engineering, Waseda University, Tokyo, Japan

<sup>2</sup>Waseda Institute for Advanced Study, Waseda University, Tokyo, Japan

<sup>3</sup>Department of Life Sciences, School of Agriculture, Meiji University, Kanagawa, Japan

\*Correspondence and proofs should be sent to:

Shigenobu Shibata

Laboratory of Physiology and Pharmacology, School of Advanced Science and Engineering

Waseda University

Wakamatsu-cho 2-2, Shinjuku-ku

Tokyo 162-8480, Japan

Telephone: +81-3-5369-7318; Fax: +81-3-3341-9815; E-mail: shibatas@waseda.jp

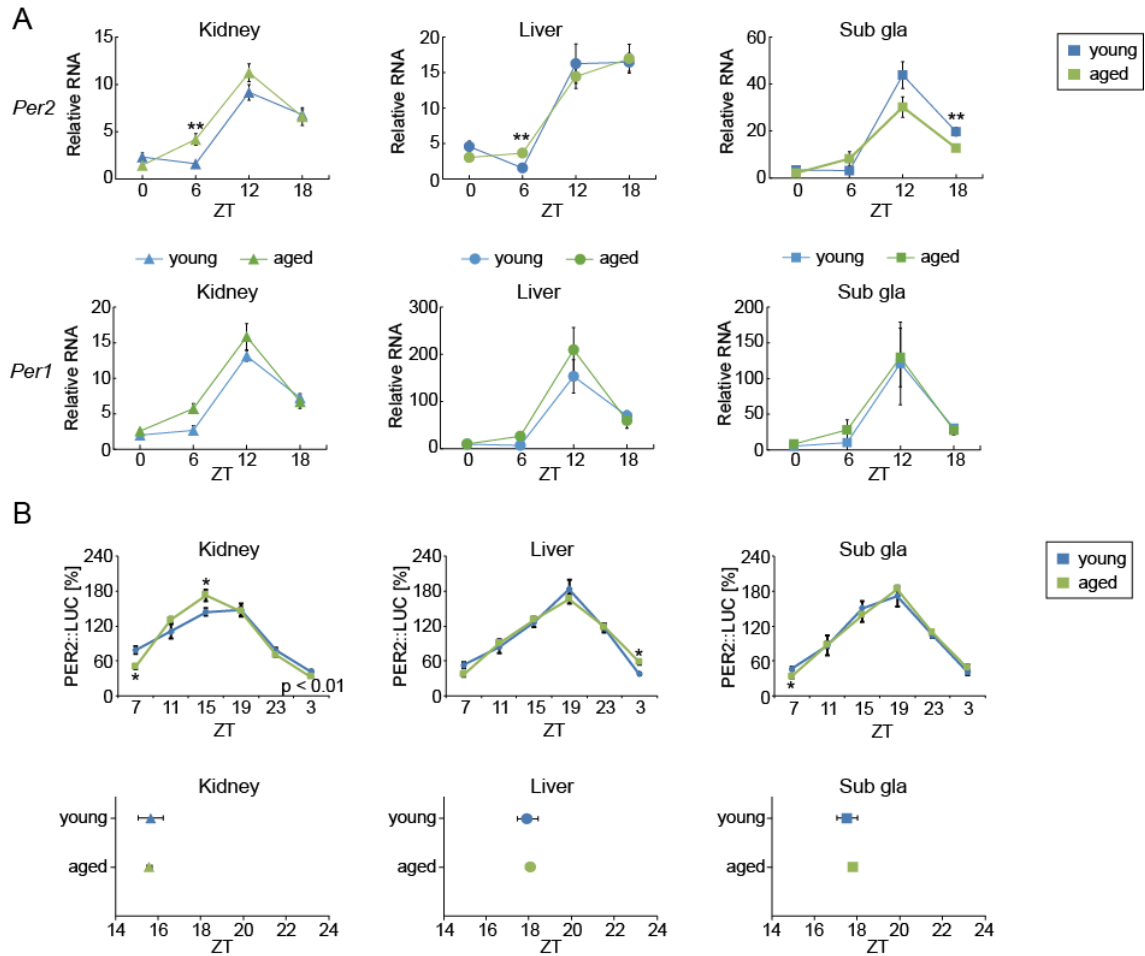

**Figure S1. *Per1* and *Per2* gene expression rhythms in female mice and peripheral PER2::LUC rhythms in male mice**

(A) *Per1* and *Per2* mRNA expression rhythms in the kidney, liver, and submandibular gland (sub gla) of young and aged female mice under the normal light-dark condition (n = 6). ZT, zeitgeber time. (B) Analysed wave forms and peak phases of PER2::LUC bioluminescence in the kidney, liver, and submandibular gland (sub gla) of young and aged male mice under the normal light-dark condition. The number of mice used is indicated in Table S1. Values are expressed as the mean  $\pm$  SEM. \*P < 0.05, \*\*P < 0.01, vs. the young group (Student's t test, Mann Whitney test, or 2-way ANOVA with Sidak post-hoc tests). The P value on the lower right side of each figure (B) indicates the result of a 2-way ANOVA between the young and aged groups.

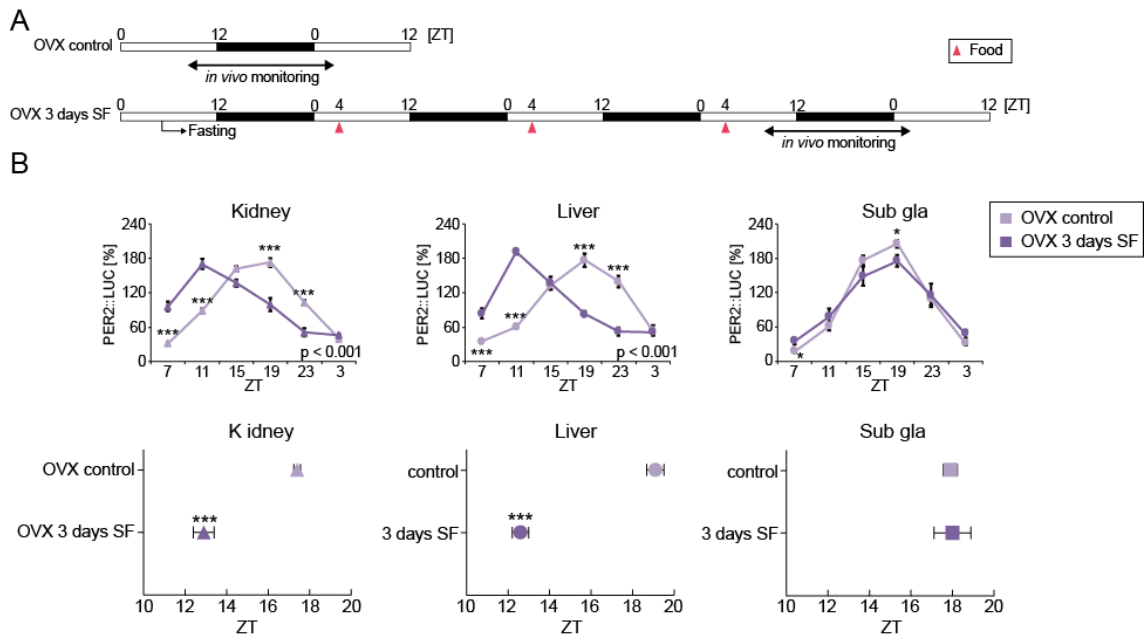

**Figure S2. Effect of ovariectomy on peripheral PER2::LUC entrainment to feeding cues**

(A) Experimental feeding schedule (SF). Young female mice were ovariectomized (OVX) at least 10 days prior to the onset of the experiment. White and black bars indicate the light and dark periods, respectively. Arrowheads indicate food timings. Food pellets (1 g for the first and second days, 1.5 g for the third day) were given to mice after overnight fasting. ZT, zeitgeber time. (B) Analysed wave forms and peak phases of PER2::LUC bioluminescence in the kidney, liver, and submandibular gland (sub gla). Values are expressed as the mean  $\pm$  SEM. The number of mice used is indicated in Table S1. \* $P < 0.05$ , \*\*\* $P < 0.001$  vs. the OVX control group (Student's t test or 2-way ANOVA with Sidak post-hoc tests). The P value on the lower right side of each figure indicates the result of a 2-way ANOVA between the control and SF groups.

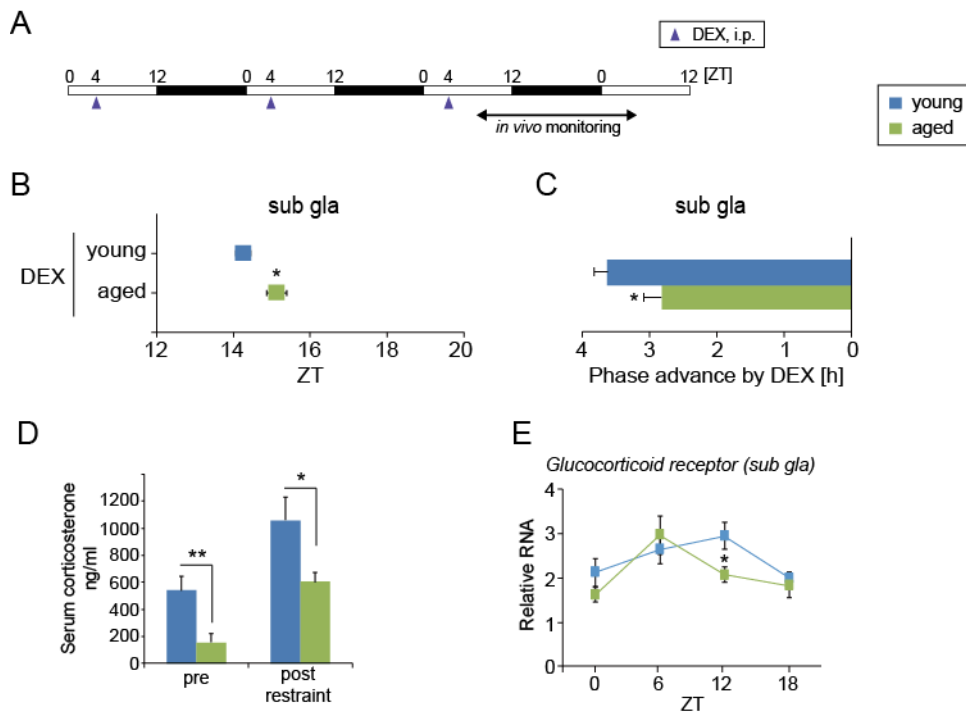

**Figure S3. Age-related changes in the glucocorticoid regulation of peripheral clocks**

(A) Experimental schedule of glucocorticoid stimulation by intraperitoneal injection of the glucocorticoid analogue dexamethasone (DEX, 1 mg/kg). White and black bars indicate the light and dark periods, respectively. Arrowheads indicate food timings. ZT, zeitgeber time. (B) Peak phases of PER2::LUC rhythms in the submandibular gland after DEX treatment. The number of mice used is indicated in Table S1. (C) Phase advance values of PER2::LUC rhythms in the submandibular gland after DEX treatment. Phase advance values were calculated as the difference between the peak times of the DEX group and the saline group. (D) Serum corticosterone levels at ZT4 (pre) and at ZT4.5 (post restraint stress) on the first day. The restraint stress paradigm was initiated on ZT4 (n = 5–6). (E) mRNA expression rhythms of the glucocorticoid receptor in the submandibular gland (n = 6). \*P < 0.05, \*\*P < 0.01 vs. the young group (Student's t test). Values are expressed as the mean  $\pm$  SEM.

**Table S1. Numbers of mice examined and tissues that met the rhythmicity criteria in each experimental group.**

| group name               | age   | number of mice | number of tissue samples showing rhythmic<br>(rhythmic/total) |       |         | Figure No.    |
|--------------------------|-------|----------------|---------------------------------------------------------------|-------|---------|---------------|
|                          |       |                | kidney                                                        | liver | sub gla |               |
| control, LD, intact, pre | young | 6              | 6/6                                                           | 6/6   | 6/6     | 1, 2, 3, 4, 5 |
| control, LD, intact, pre | aged  | 9              | 9/9                                                           | 9/9   | 9/9     | 1, 2, 3, 4, 5 |
| DD                       | young | 4              | 4/4                                                           | 4/4   | 4/4     | 1             |
| DD                       | aged  | 6              | 6/6                                                           | 6/6   | 6/6     | 1             |
| shift day 5-6            | young | 10             | 9/10                                                          | 7/10  | 10/10   | 2             |
| shift day 5-6            | aged  | 8              | 8/8                                                           | 7/8   | 8/8     | 2             |
| shift day 9-10           | young | 8              | 8/8                                                           | 8/8   | 8/8     | 2             |
| shift day 9-10           | aged  | 8              | 8/8                                                           | 8/8   | 8/8     | 2             |
| 2 days SF                | young | 6              | 6/6                                                           | 6/6   | 6/6     | 3             |
| 3 days SF                | young | 6              | 6/6                                                           | 5/6   | 6/6     | 3             |
| 2 days SF                | aged  | 8              | 7/8                                                           | 6/8   | 8/8     | 3             |
| 3 days SF                | aged  | 5              | 5/5                                                           | 5/5   | 5/5     | 3             |
| SF 6 points              | young | 8              | 8/8                                                           | 8/8   | 8/8     | 4             |
| SF 6 points              | aged  | 7              | 7/7                                                           | 7/7   | 7/7     | 4             |
| restraint stress         | young | 7              | 7/7                                                           | 6/7   | 7/7     | 5             |
| restraint stress         | aged  | 6              | 6/6                                                           | 6/6   | 6/6     | 5             |
| treadmill exercise       | young | 8              | 8/8                                                           | 7/8   | 8/8     | 5             |
| treadmill exercise       | aged  | 10             | 10/10                                                         | 10/10 | 10/10   | 5             |
| saline                   | young | 4              | 4/4                                                           | 4/4   | 4/4     | 6             |
| saline                   | aged  | 5              | 5/5                                                           | 5/5   | 5/5     | 6             |
| NE 1 mg/kg               | young | 4              |                                                               |       | 4/4     | 6             |
| NE 1 mg/kg               | aged  | 5              |                                                               |       | 5/5     | 6             |
| NE 2 mg/kg               | young | 4              |                                                               |       | 4/4     | 6             |
| NE 2 mg/kg               | aged  | 5              |                                                               |       | 5/5     | 6             |
| PHE                      | young | 8              |                                                               |       | 8/8     | 6             |
| PHE                      | aged  | 7              |                                                               |       | 6/7     | 6             |
| ISO                      | young | 8              |                                                               |       | 8/8     | 6             |
| ISO                      | aged  | 10             |                                                               |       | 10/10   | 6             |
| male LD                  | young | 3              | 3/3                                                           | 3/3   | 3/3     | S1            |
| male LD                  | aged  | 4              | 4/4                                                           | 4/4   | 4/4     | S1            |
| OVX control              | young | 4              | 4/4                                                           | 4/4   | 4/4     | S2            |
| OVX 3 days SF            | young | 4              | 4/4                                                           | 3/4   | 4/4     | S2            |
| DEX                      | young | 6              | 6/6                                                           | 6/6   | 6/6     | S3            |
| DEX                      | aged  | 6              | 6/6                                                           | 6/6   | 6/6     | S3            |

Table S2. ANOVA results.

| Figure No. | detail                 | ANOVA            | main effect A |                    |           | main effect B |                    |           | Interaction effect |           |
|------------|------------------------|------------------|---------------|--------------------|-----------|---------------|--------------------|-----------|--------------------|-----------|
|            |                        |                  | factor        | F                  | P-value   | factor        | F                  | P-value   | F                  | P-value   |
| 1E         | LD kidney              | two-way repeated | time          | F (5, 65) = 85.11  | p < 0.001 | age           | F (1, 13) = 1.56   | p = 0.23  | F (5, 65) = 2.53   | p < 0.05  |
| 1E         | LD liver               | two-way repeated | time          | F (5, 65) = 61.22  | p < 0.001 | age           | F (1, 13) = 1.56   | p = 0.23  | F (5, 65) = 1.39   | p = 0.23  |
| 1E         | LD sub gla             | two-way repeated | time          | F (5, 65) = 85.11  | p < 0.001 | age           | F (1, 13) = 1.56   | p = 0.23  | F (5, 65) = 2.53   | p < 0.05  |
| 1E         | DD kidney              | two-way repeated | time          | F (5, 40) = 21.07  | p < 0.001 | age           | F (1, 8) = -12.31  | p > 0.99  | F (5, 40) = 10.94  | p < 0.001 |
| 1E         | DD liver               | two-way repeated | time          | F (5, 40) = 21.17  | p < 0.001 | age           | F (1, 8) = 0.00    | p > 0.99  | F (5, 40) = 21.17  | p < 0.001 |
| 1E         | DD sub gla             | two-way repeated | time          | F (5, 40) = 16.97  | p < 0.001 | age           | F (1, 8) = 4.57    | p = 0.06  | F (5, 40) = 8.37   | p < 0.001 |
| 2C         | shift day 5-6 kidney   | two-way repeated | time          | F (5, 70) = 74.90  | p < 0.001 | age           | F (1, 14) = 26.78  | p < 0.001 | F (5, 70) = 0.27   | p = 0.92  |
| 2C         | shift day 5-6 liver    | two-way repeated | time          | F (5, 60) = 43.32  | p < 0.001 | age           | F (1,12) = 4.80    | p < 0.05  | F (5, 60) = 0.83   | p = 0.52  |
| 2C         | shift day 5-6 sub gla  | two-way repeated | time          | F (5, 80) = 54.54  | p < 0.001 | age           | F (1, 16) = 19.43  | p < 0.001 | F (5, 80) = 1.86   | p = 0.11  |
| 2C         | shift day 9-10 kidney  | two-way repeated | time          | F (5, 70) = 91.86  | p < 0.001 | age           | F (1,14) = 0.87    | p = 0.36  | F (5, 70) = 4.15   | p < 0.01  |
| 2C         | shift day 9-10 liver   | two-way repeated | time          | F (5, 70) = 84.01  | p < 0.001 | age           | F (1, 14) = 0.00   | p > 0.99  | F (5, 70) = 3.19   | p < 0.05  |
| 2C         | shift day 9-10 sub gla | two-way repeated | time          | F (5, 70) = 100.50 | p < 0.001 | age           | F (1,14) = 0.00    | p > 0.99  | F (5, 70) = 1.03   | p = 0.40  |
| 3E         | 3 days SF kidney       | two-way repeated | time          | F (5, 45) = 43.41  | p < 0.001 | age           | F (1, 9) = -7.71   | p > 0.99  | F (5, 45) = 1.84   | p = 0.12  |
| 3E         | 3 days SF liver        | two-way repeated | time          | F (5, 45) = 48.80  | p < 0.001 | age           | F (1, 9) = -4.80   | p > 0.99  | F (5, 45) = 1.64   | p = 0.16  |
| 3E         | 3 days SF sub gla      | two-way repeated | time          | F (5, 45) = 16.24  | p < 0.001 | age           | F (1, 9) = 0.00    | p > 0.99  | F (5, 45) = 5.24   | p < 0.001 |
| 4B         | SF 6 points            | two-way repeated | time          | F (5, 65) = 46.78  | p < 0.001 | age           | F (1, 13) = -23.11 | p > 0.99  | F (5, 65) = 4.06   | p < 0.01  |
| 4B         | SF 6 points            | two-way repeated | time          | F (5, 65) = 36.90  | p < 0.001 | age           | F (1, 13) = 3.25   | p = 0.09  | F (5, 65) = 2.04   | p = 0.08  |
| 4B         | SF 6 points            | two-way repeated | time          | F (5, 65) = 99.22  | p < 0.001 | age           | F (1, 13) = -2.60  | p > 0.99  | F (5, 65) = 6.10   | p < 0.001 |
| 5B         | kidney young           | two-way repeated | time          | F (5, 55) = 42.67  | p < 0.001 | age           | F (1, 11) = 1.18   | p = 0.29  | F (5, 55) = 17.48  | p < 0.001 |
| 5B         | liver young            | two-way repeated | time          | F (5, 50) = 24.26  | p < 0.001 | age           | F (1,10) = 1.00    | p = 0.34  | F (5, 50) = 2.93   | p < 0.05  |
| 5B         | sub gla young          | two-way repeated | time          | F (5, 55) = 55.27  | p < 0.001 | age           | F (1, 11) = 1.18   | p = 0.29  | F (5, 55) = 16.49  | p < 0.001 |
| 5B         | kidney aged            | two-way repeated | time          | F (5, 65) = 89.86  | p < 0.001 | age           | F (1, 13) = 6.18   | p < 0.05  | F (5, 65) = 12.50  | p < 0.001 |
| 5B         | liver aged             | two-way repeated | time          | F (5, 65) = 74.64  | p < 0.001 | age           | F (1, 13) = 1.30   | p = 0.27  | F (5, 65) = 5.49   | p < 0.001 |
| 5B         | sub gla aged           | two-way repeated | time          | F (5, 65) = 106.6  | p < 0.001 | age           | F (1,13) = 6.84    | p < 0.05  | F (5, 65) = 7.56   | p < 0.001 |
| 5E         | treadmill kidney       | two-way repeated | time          | F (5, 80) = 72.42  | p < 0.001 | age           | F (1,16) = 1.00    | p = 0.33  | F (5, 80) = 2.38   | p < 0.05  |
| 5E         | treadmill liver        | two-way repeated | time          | F (5, 75) = 49.73  | p < 0.001 | age           | F (1, 15) = -2.14  | p > 0.99  | F (5, 75) = 1.41   | p = 0.22  |
| 5E         | treadmill sub gla      | two-way repeated | time          | F (5, 80) = 62.71  | p < 0.001 | age           | F (1,16) = 10.00   | p < 0.01  | F (5, 80) = 2.73   | p < 0.05  |
| S1B        | LD male kidney         | two-way repeated | time          | F (5, 25) = 87.13  | p < 0.001 | age           | F (1,5) = 0.50     | p = 0.50  | F (5, 25) = 4.00   | p < 0.01  |
| S1B        | LD male liver          | two-way repeated | time          | F (5, 25) = 78.10  | p < 0.001 | age           | F (1,5) = -2.63    | p > 0.99  | F (5, 25) = 1.54   | p = 0.21  |
| S1B        | LD male sub gla        | two-way repeated | time          | F (5, 25) = 68.04  | p < 0.001 | age           | F (1,5) = 38.89    | p = 0.00  | F (5, 25) = 0.61   | p = 0.68  |
| S2B        | OVX kidney             | two-way repeated | time          | F (5, 30) = 74.53  | p < 0.001 | age           | F (1, 6) = 1.77    | p = 0.23  | F (5, 30) = 37.64  | p < 0.001 |
| S2B        | OVX liver              | two-way repeated | time          | F (5, 30) = 39.57  | p < 0.001 | age           | F (1, 6) = 0.00    | p > 0.99  | F (5, 30) = 52.95  | p < 0.001 |
| S2B        | OVX sub gla            | two-way repeated | time          | F (5, 30) = 64.19  | p < 0.001 | age           | F (1, 6) = 0.00    | p > 0.99  | F (5, 30) = 1.855  | p = 0.13  |

**Table S3. Cosinor analysis of RT-PCR data.**

| Figure No. | Tissue  | Name                           | young           |                 | aged            |                 |
|------------|---------|--------------------------------|-----------------|-----------------|-----------------|-----------------|
|            |         |                                | Goodness of fit | Achrophase (hr) | Goodness of fit | Achrophase (hr) |
| 6          | sub gla | <i>Adra1a</i>                  | 0.049           | 12.6            | 0.018           | 14.4            |
| 6          | sub gla | <i>Adra1b</i>                  | 0.364           | 2.4             | 0.025           | 21.6            |
| 6          | sub gla | <i>Adra1d</i>                  | 0.026           | 9               | 0.099           | 2.4             |
| 6          | sub gla | <i>Adra2a</i>                  | 0.06            | 5.4             | 0.028           | 19.8            |
| 6          | sub gla | <i>Adra2b</i>                  | 0.139           | 0.6             | 0.263           | 0.6             |
| 6          | sub gla | <i>Adra2c</i>                  | 0.043           | 3               | 0.017           | 3               |
| 6          | sub gla | <i>Adrβ1</i>                   | 0.252           | 6               | 0.016           | 6.6             |
| 6          | sub gla | <i>Adrβ2</i>                   | 0.023           | 9               | 0.221           | 9.6             |
| 6          | sub gla | <i>Adrβ3</i>                   | 0.047           | 4.8             | 0.011           | 4.8             |
| 6          | sub gla | NE                             | 0.249           | 12              | 0.044           | 0.6             |
| 6          | sub gla | MHPG                           | 0.003           | 19.8            | 0.145           | 0.6             |
| 6          | sub gla | MHPG/NE                        | 0.031           | 20.4            | 0.22            | 18              |
| S1         | kidney  | <i>Per2</i>                    | 0.022           | 14.4            | 0.006           | 13.2            |
| S1         | liver   | <i>Per2</i>                    | 0.018           | 15.6            | 0.019           | 15              |
| S1         | sub gla | <i>Per2</i>                    | 0.043           | 13.2            | 0.02            | 12.6            |
| S1         | kidney  | <i>Per1</i>                    | 0.028           | 13.2            | 0.026           | 12              |
| S1         | liver   | <i>Per1</i>                    | 0.041           | 13.8            | 0.052           | 12.6            |
| S1         | sub gla | <i>Per1</i>                    | 0.063           | 12.6            | 0.055           | 12              |
| S3         | sub gla | <i>Glucocorticoid receptor</i> | 0.03            | 9.6             | 0.089           | 7.2             |

**Table S4. Primer sequences for RT-PCR analyses.**

|                                |                              |
|--------------------------------|------------------------------|
| <i>Gapdh</i>                   | 5'-tggatgaaggtcgggtggaac-3'  |
|                                | 5'-aatgaaggggtcgttgatgg-3'   |
| <i>Per1</i>                    | 5'-caagtggaatgagccaacg-3'    |
|                                | 5'-cgaagttgagctcccgaagtg-3'  |
| <i>Per2</i>                    | 5'-tgtgtgcttacacgggtgccta-3' |
|                                | 5'-acgtttggttgcatgaa-3'      |
| <i>Adra1a</i>                  | 5'-atgaggagccaggatacgtg-3'   |
|                                | 5'-tctgactgtcggcttgagg-3'    |
| <i>Adra1b</i>                  | 5'-gctacattggggtgcgatac-3'   |
|                                | 5'-tggacaagaccacacactg-3'    |
| <i>Adra1d</i>                  | 5'-tctccgtaaggctgctcaag-3'   |
|                                | 5'-aaccagcacaggacgaagac-3'   |
| <i>Adra2a</i>                  | 5'-aggccatcgagtacaacctg-3'   |
|                                | 5'-cagcgccttcttctctatg-3'    |
| <i>Adra2b</i>                  | 5'-gccgagcattggagtacaac-3'   |
|                                | 5'-ttgtagatgagggcggtag-3'    |
| <i>Adra2c</i>                  | 5'-tgtatggcatctgccgtgag-3'   |
|                                | 5'-actgttcagtagccgatcc-3'    |
| <i>Adrb1</i>                   | 5'-gtaacgtgctggtgatcgtg-3'   |
|                                | 5'-gaaaggcaccaccagcaatc-3'   |
| <i>Adrb2</i>                   | 5'-ataatctccttggcgtgtgc-3'   |
|                                | 5'-gaactcgaccagaagttgc-3'    |
| <i>Adrb3</i>                   | 5'-ccctcctcaaaactccatcc-3'   |
|                                | 5'-tttccatctcctcctgcac-3'    |
| <i>Glucocorticoid receptor</i> | 5'-aatgggcaaaggcgatacc-3'    |
|                                | 5'-gggcaaatgcatgagaac-3'     |



## **Supplemental methods**

### **Ovariectomy**

Ovariectomy was carried out using the dorsal approach under midazolam/xylazine-induced anaesthesia. Briefly, the skin of the back was shaved and disinfected, and an incision of approximately 1 cm was made above and parallel-to the spinal cord. Small openings were made in the muscle layers to the left and right of the spinal cord and both ovaries were removed from the surrounding fatty tissue. Ovariectomized mice were allowed to recover for a period of at least 10 days prior to experimental use.

### **Enzyme-linked immunosorbent assay (ELISA)**

Whole blood was allowed to clot at room temperature for at least 30 min, and the resultant clots were removed by centrifugation at 3000 rpm at room temperature for 20 min. An ELISA (Assay Pro, MO, USA) was used to measure serum concentrations of corticosterone according to manufacturer instructions.
